# Supplementary material
Source: PubMed Central journal article supplement (PMC524461)

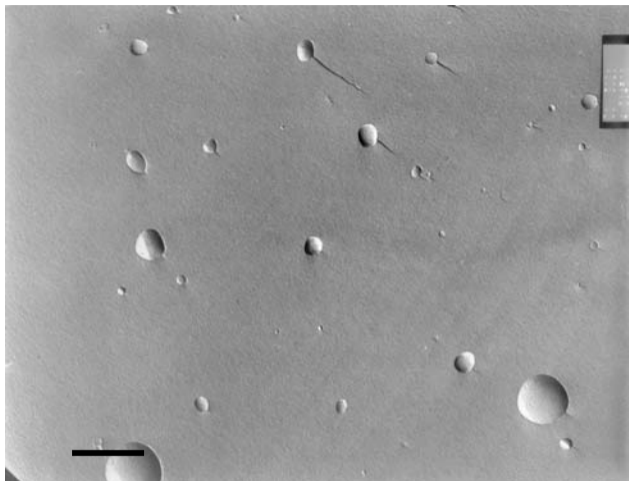

Supplement: pnas_101_43_15279__1.pdf [file pnas_101_43_15279__1.pdf]

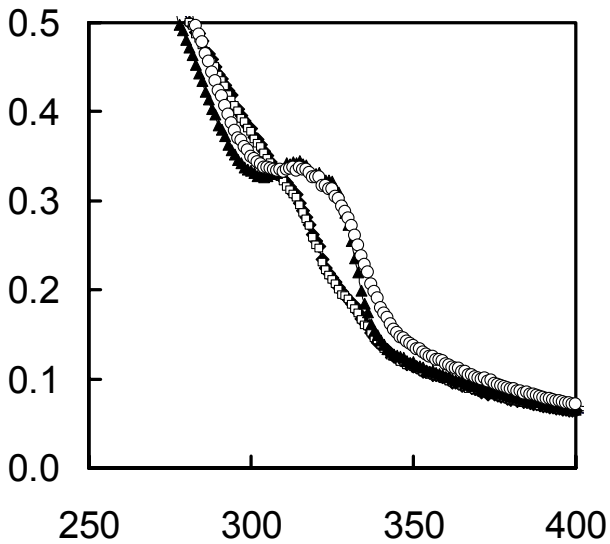

Supplement: pnas_101_43_15279__2.pdf [file pnas_101_43_15279__2.pdf]

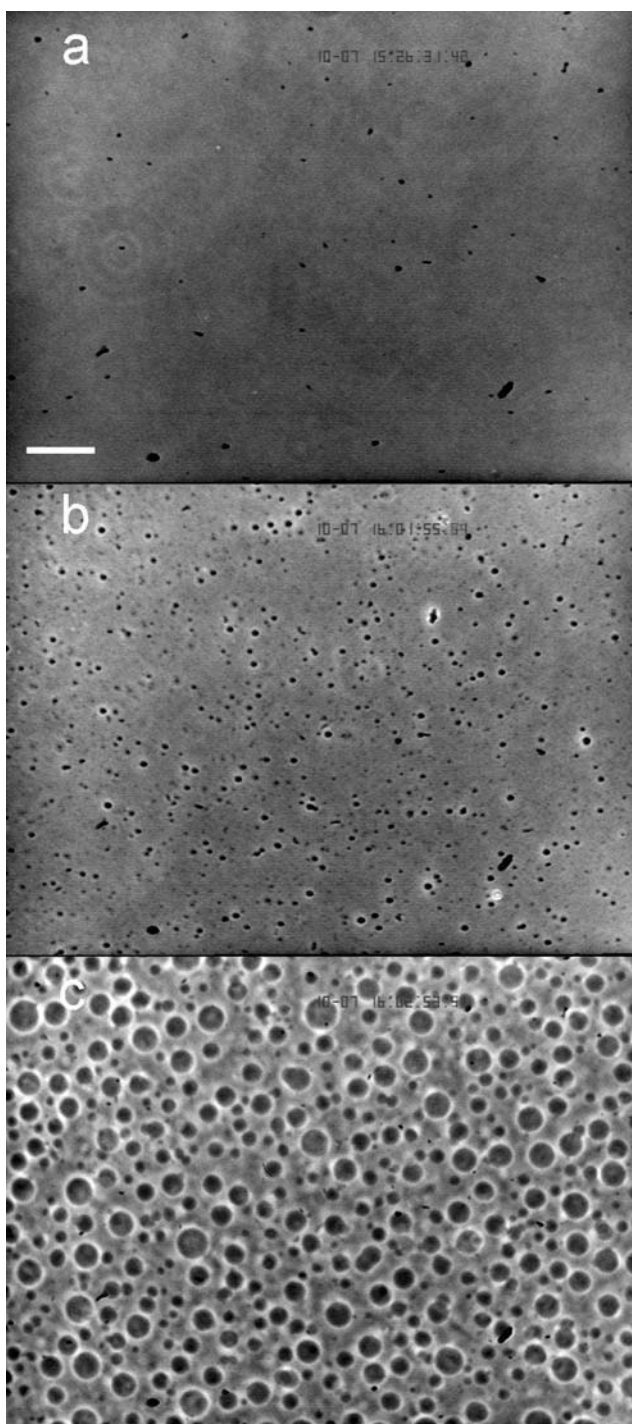

Supplement: pnas_101_43_15279__3.pdf [file pnas_101_43_15279__3.pdf]
